# Supplementary material for: BAK1 is involved in AtRALF1-induced inhibition of root cell expansion
Source: PubMed Central journal article supplement (PMC5656322; doi:10.1371/journal.pgen.1007053), 2017-10-13

A

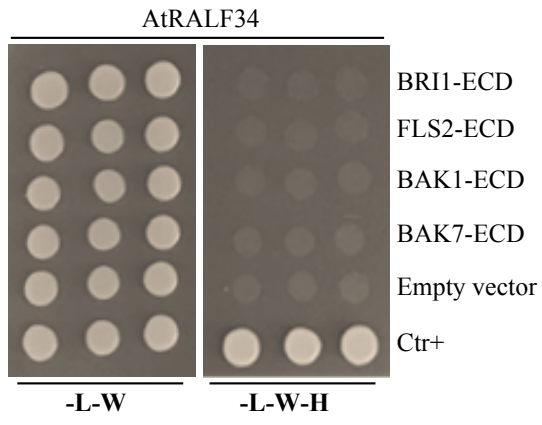

B

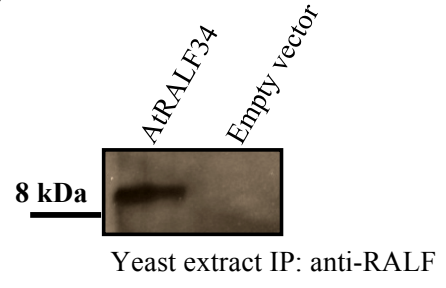

Supplement: pgen.1007053.s013.pdf [file pgen.1007053.s013.pdf]
