# Supplementary material for: BAK1 is involved in AtRALF1-induced inhibition of root cell expansion
Source: PubMed Central journal article supplement (PMC5656322; doi:10.1371/journal.pgen.1007053), 2017-10-13
Supplement: pgen.1007053.s020.pdf [file pgen.1007053.s020.pdf]

H<sub>2</sub>O R9-49 (2 μM)  
BL (0.1 μM)  
R1 (1 μM)  
R1 (2 μM)  
R1 (10 μM)

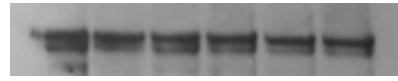

Anti-phospho-Ser

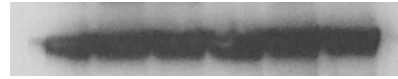

Anti-HA
