# Supplementary material for: BAK1 is involved in AtRALF1-induced inhibition of root cell expansion
Source: PubMed Central journal article supplement (PMC5656322; doi:10.1371/journal.pgen.1007053), 2017-10-13
Supplement: pgen.1007053.s022.pdf [file pgen.1007053.s022.pdf]

**S1 Table. Primers used.**

| Primer Name             | Sequence 5' - 3'                  | Purpose                      |
|-------------------------|-----------------------------------|------------------------------|
| AtRALF1-Fw              | GGGCATATGATATTGGCGACCACAAAATACAT  | Cloning for yeast two hybrid |
| AtRALF1-Rv              | TTGGGATCCGTCTAACTCTGCAACGAGCAAT   |                              |
| AtRALF34- Fw            | CGCATATGTATTACATATCGTACGG         |                              |
| AtRALF34- Rv            | TTAGGATCCCTTCATCTATCTCCGGCA       |                              |
| BAK7-ECD-Fw             | GCGCATATGGCTGAAGGTGATGCTTTGACT    |                              |
| BAK7-ECD-Rv             | CGCGGATCCCCATTTGCCCCCTGAAGGT      |                              |
| BRI1-ECD-Fw             | GCGCATATGGCTTCACCATCTCAGTCTTTA    |                              |
| BRI1-ECD-Rv             | CGCGGATCCCTCCCATCGCCACACTACCAGCAA |                              |
| FLS2-ECD-Fw             | GCGCATATGAAACAGAGCTTTGAACCAGAGAT  |                              |
| FLS2-ECD-Rv             | CGCGGATCCCAATCAGGATGACTCTGGTT     |                              |
| BAK1-ECD-Fw             | GCGCATATGGCCGAAGGTGATGCTCTAA      |                              |
| BAK1-ECD-Rv             | CGCGGATCCCTCTATTACTCCCTGCAGGTGAT  |                              |
| N-term-L zippers-Fw     | GCGCATATGGACAATAGTGTACACGTGT      |                              |
| N-term-L zippers-Rv     | CGCGGATCCCTCTATTACTCCCTGCAGGTGAT  |                              |
| N-term-LRR1-Fw          | GCGCATATGCTTCCAACTTGCACTACTTGGGA  |                              |
|                         |                                   |                              |
| Primer Name             | Sequence 5' - 3'                  | Purpose                      |
| N-term-LRR1-Rv          | CGCGGATCCCTCTATTACTCCCTGCAGGTGAT  | Cloning for yeast two hybrid |
| N-term-LRR2-Fw          | GCGCATATGCTGACGGAATTGGTGAGCTT     |                              |
| N-term-LRR2-Rv          | CGCGGATCCCTCTATTACTCCCTGCAGGTGAT  |                              |
| N-term-LRR3-Fw          | GCGCATATGCTTAAGAACTCCGTTTCTTGCGT  |                              |
| N-term-LRR3-Rv          | CGCGGATCCCTCTATTACTCCCTGCAGGTGAT  |                              |
| N-term-LRR4-Fw          | GCGCATATGGTCTGACGCTACAAGTTCT      |                              |
| N-term-LRR4-Rv          | CGCGGATCCCTCTATTACTCCCTGCAGGTGAT  |                              |
| N-term-LRR5-Fw          | GCGCATATGTCACCTTTTCACTCCAATCAGTT  |                              |
| N-term-LRR5-Rv          | CGCGGATCCCTCTATTACTCCCTGCAGGTGAT  |                              |
| C-term-P rich region-Fw | GCGCATATGGCCGAAGGTGATGCTCTAAGT    |                              |
| C-term-P rich region-Rv | CGCGGATCCCAAAGGAACCATTAACAGGA     |                              |
| C-term-LRR1-Fw          | GCGCATATGGCCGAAGGTGATGCTCTAAGT    |                              |
| C-term-LRR1-Rv          | CGCGGATCCCGCTATTGCAAGTAACATGAA    |                              |
| C-term-LRR2-Fw          | GCGCATATGGCCGAAGGTGATGCTCTAAGT    |                              |
| C-term-LRR2-Rv          | CGCGGATCCCTGACCAAGTTGCATTACGAGCT  |                              |

| Primer Name       | Sequence 5' - 3'                | Purpose                              |
|-------------------|---------------------------------|--------------------------------------|
| C-term-LRR3-Fw    | GCGCATATGGCCGAAGGTGATGCTCTAAGT  | Cloning for yeast two hybrid         |
| C-term-LRR3-Rv    | CGCGGATCCCATTTCCAAGCTGTTCTGGGA  |                                      |
| C-term-LRR4-Fw    | GCGCATATGGCCGAAGGTGATGCTCTAAGT  |                                      |
| C-term-LRR4-Rv    | CGCGGATCCCTCGGCCGAGAGTTGATGGAAT |                                      |
| C-term-LRR5-Fw    | GCGCATATGGCCGAAGGTGATGCTCTAAGT  |                                      |
| C-term-LRR5-Rv    | CGCGGATCCAGCAGTCAAAGACCTTGGGA   |                                      |
| GAPDH-Fw          | TTGGTGACAACAGGTCAAGCA           | Semi-quantitative RT-PCR and qRT-PCR |
| GAPDH-Rv          | AAACTGTGCTCAATGCAATC            |                                      |
| PRP3-Fw           | GTTCCGACCCAGCATCATAC            |                                      |
| PRP3-Rv           | GCAAGTCTCGACCCGAGATA            |                                      |
| HRGP2-Fw          | CACAGTTGCTAATGAAACGA            |                                      |
| HRGP2-Rv          | CGGCGTGAATATCTCTTGT             |                                      |
| CPD-Fw            | AGCAACTCGGTAACGACAGG            |                                      |
| CPD-Rv            | CAGAGAGTGCAACCTAGCC             |                                      |
| DWF4-Fw           | GTTGGTGGAAAGTGTACCG             |                                      |
| DWF4-Rv           | CTGTTGCCATCTCCAAGGAT            |                                      |
| BAK1-Fw           | GTCAGAAAGTAGTGTCCGA             |                                      |
| BAK1-Rv           | ACTTGTAGCGTCAGGACAGC            |                                      |
| AtRALF1- Fw       | GGGCATATGATATTGGCGAC            |                                      |
| AtRALF1- Rv       | TTGGGATCCGTCTAACTCT             |                                      |
| Promoter 35S - Fw | ATCCCACTATCCTTCGCAAGACCCTTCTCTA |                                      |
| Aequorin-Rv       | TGGTGTATGCTTTCCATTATCCA         |                                      |
